# Supplementary material
Source: PubMed Central journal article supplement (PMC2593910)
Supplement: NIHMS60643-supplement-supplement_1.pdf [file NIHMS60643-supplement-supplement_1.pdf]

Online

Appendix 1: Differences between the study periods before and after HAART availability

| CSF Parameters                              | 2001-02 |                     | 2006   |                     | P-value |
|---------------------------------------------|---------|---------------------|--------|---------------------|---------|
|                                             | Median  | Interquartile Range | Median | Interquartile Range |         |
| Age                                         | 34.5    | 29 – 38             | 36     | 31 – 42             | .27     |
| Antecedent Symptoms (days)                  | 14      | 7 – 21              | 14     | 7 – 21              | .43     |
| Opening pressure, mmH <sub>2</sub> O*       | 330     | 240-476             | 330    | 191 -465            | .42     |
| CSF pressure $\geq$ 200 mm H <sub>2</sub> O |         | 84%                 |        | 69%                 | .09     |
| CSF Pressure >560 mm H <sub>2</sub> O       |         | 20%                 |        | 17%                 | .6      |
| Therapeutic LP performed                    |         | 5%                  |        | 5%                  | .9      |
| CSF Protein, mg/dL                          | 40      | 30-40               | 70     | 40 – 120            | .002    |
| CSF Glucose, mg/dL                          | 56      | 32-65               | 37     | 28-50               | .008    |
| CSF WBC, cells/mL                           | 5       | <5 – 62             | 10     | <5 – 53             | .9      |

\* maximum measurable opening pressure was 560 mm.
